# Supplementary material for: Chemical fractionation of a terrestrial humic acid upon sorption on alumina by high resolution mass spectrometry
Source: Royal Society of Chemistry journal article supplement (doi:10.1039/c5ra12091h), 2015-01-01
Supplement: c5ra12091h1.pdf [file c5ra12091h1.pdf]

## Supplementary Information

### Figure S1:

UV-visible spectra of the WSAHA native solution and of the supernatants collected at the end of the experiments of WSAHA sorption performed at  $\text{Al}_2\text{O}_3$ -to-solution ratios  $r$  from 4.9 to  $25 \text{ g.L}^{-1}$  at pH 3.7

### Figure S2:

Van Krevelen diagram gathering WSAHA constituents that showed a low affinity for the alumina surface (compounds represented in Fig. 6e) including (o) that were not detected on the ESI(-)FTMS spectrum of the filtrate obtained after ultrafiltration of WSAHA native solution with a 3kDa-membrane and (●) whose elemental composition matched that of compounds detected in the 3kDa-filtrate.

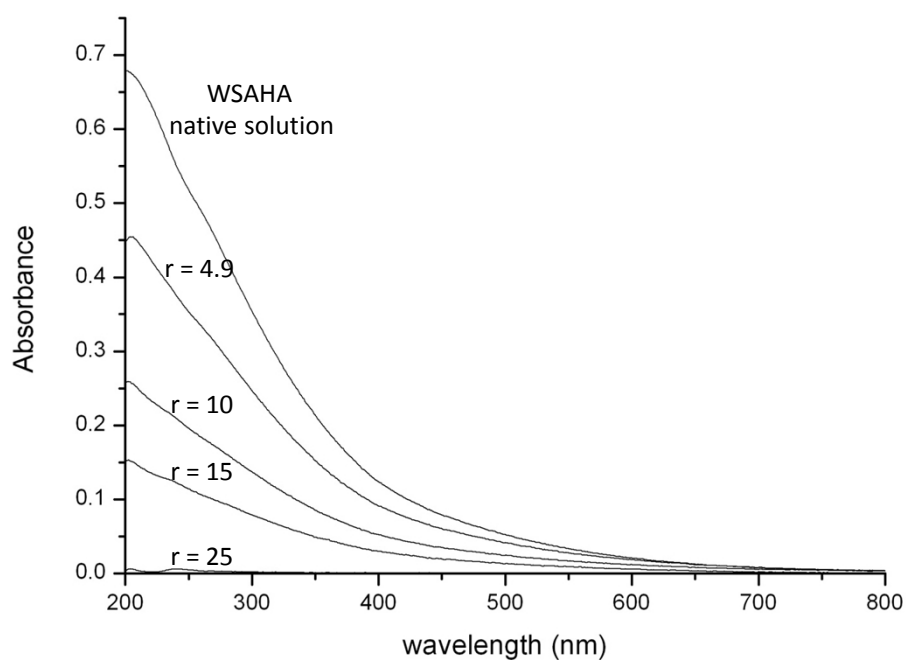

Figure S1

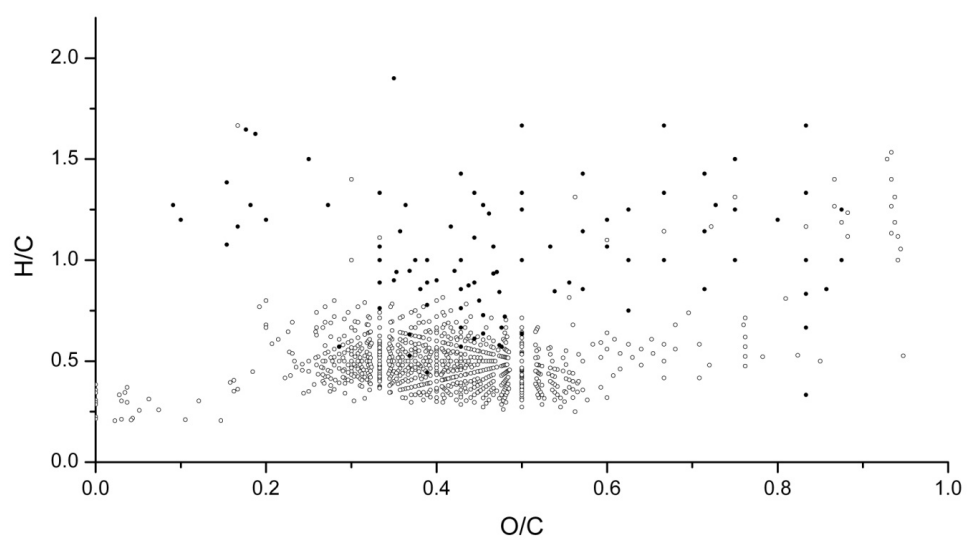

Figure S2
